# Supplementary material
Source: PubMed Central journal article supplement (PMC4978085)
Supplement: NIHMS779560-supplement-Supplemental_Digital_Content.pdf [file NIHMS779560-supplement-Supplemental_Digital_Content.pdf]

**SUPPLEMENTARY MATERIALS FOR**  
**AIRBORNE DIOXINS, FURANS AND POLYCYCLIC AROMATIC HYDROCARBONS EXPOSURE**  
**TO MILITARY PERSONNEL IN IRAQ**

Mauro Masiol,<sup>1</sup> Timothy Mallon,<sup>2</sup> Kevin M. Haines, Jr.,<sup>2</sup> Mark J. Utell,<sup>3</sup> and Philip K. Hopke<sup>1</sup>

1. Center for Air Resources Engineering and Science, Clarkson University, Potsdam, NY 13699

2. Uniformed Services University of the Health Sciences, Bethesda, MD 20814

3. Departments of Medicine and Environmental Medicine, University of Rochester Medical Center, Rochester, NY 14642

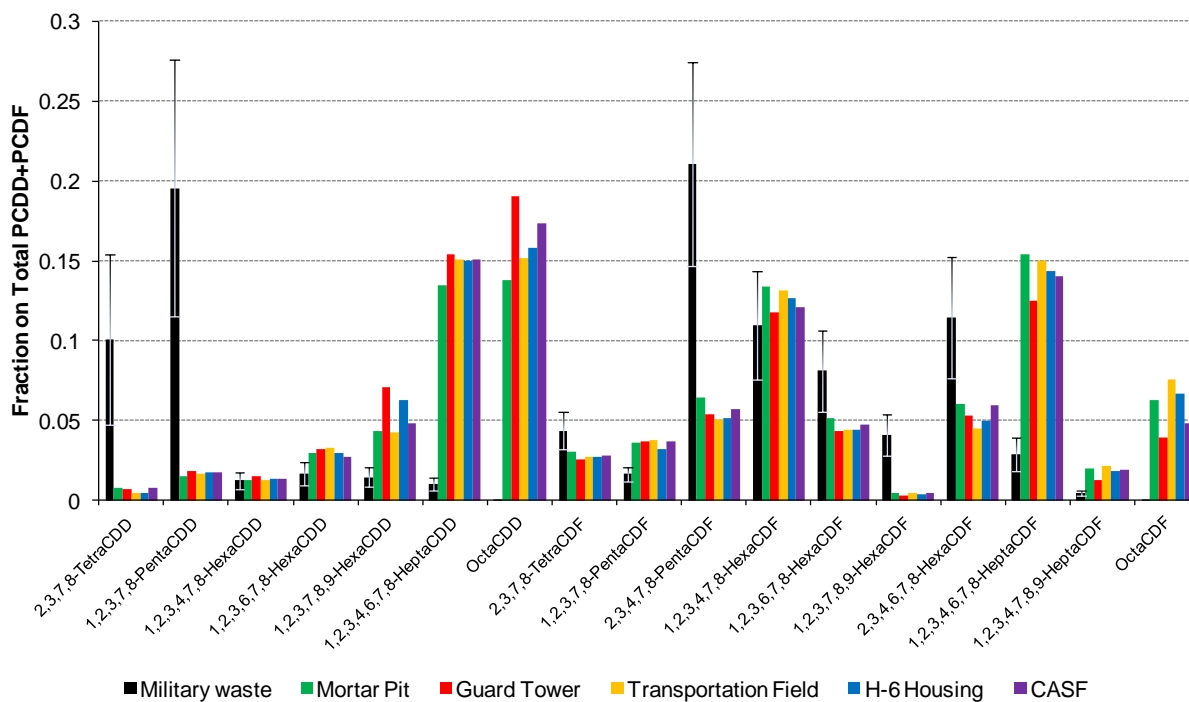

Figure S 1, Average fractions of PCDD/F homologues to total PCDDs + PCDFs at JBB compared to data from simulated burning of military waste from Woodall et al. Error bars refer to standard error of means.

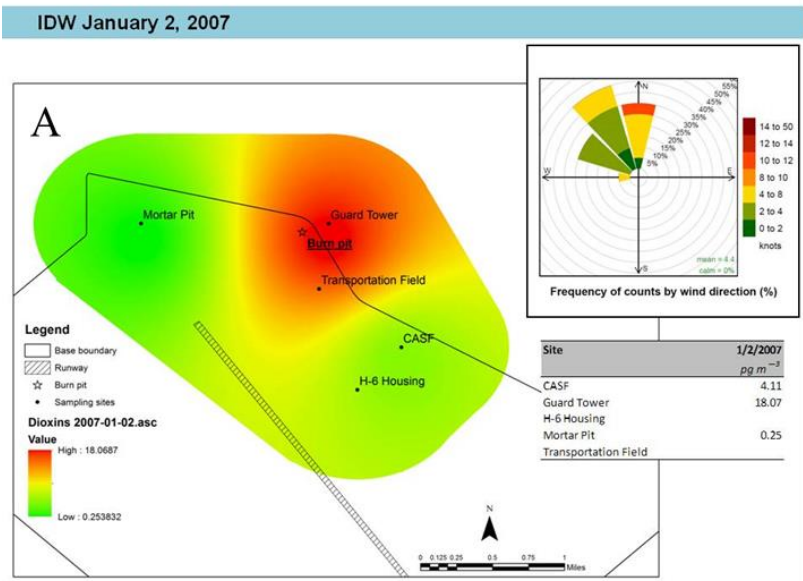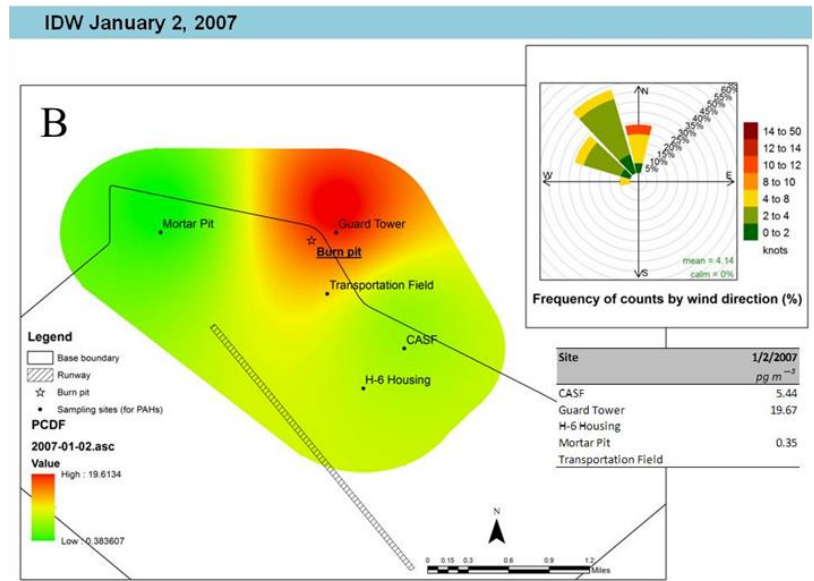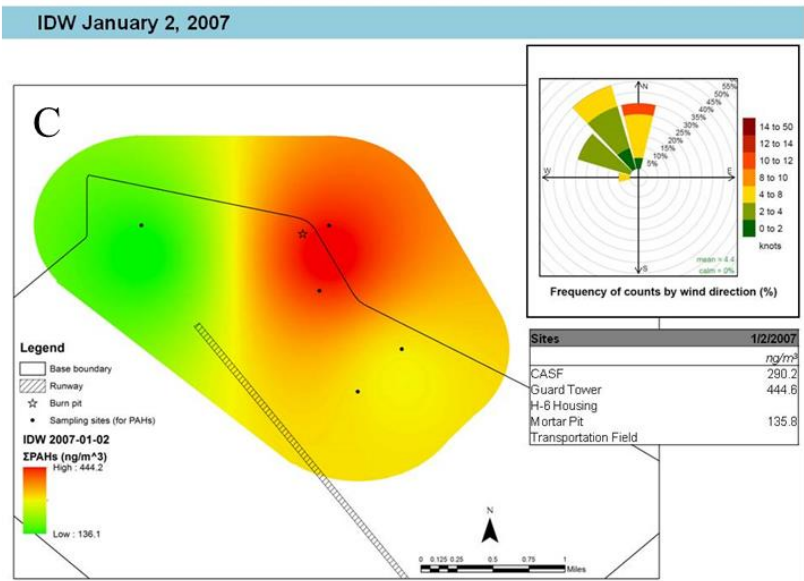

Figure S 2. Interpolated maps for the sum of the PCDD compounds (A), PCDF compounds (B), and PAH compounds (C) on January 2, 2007.

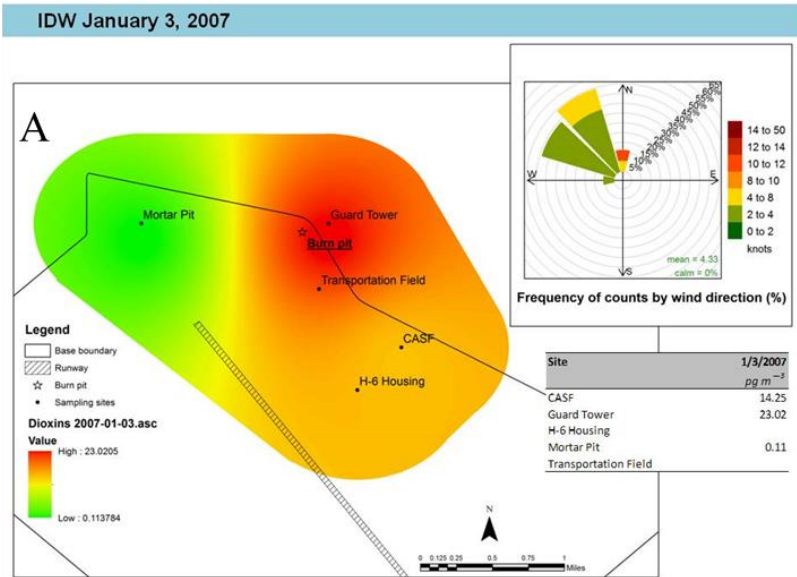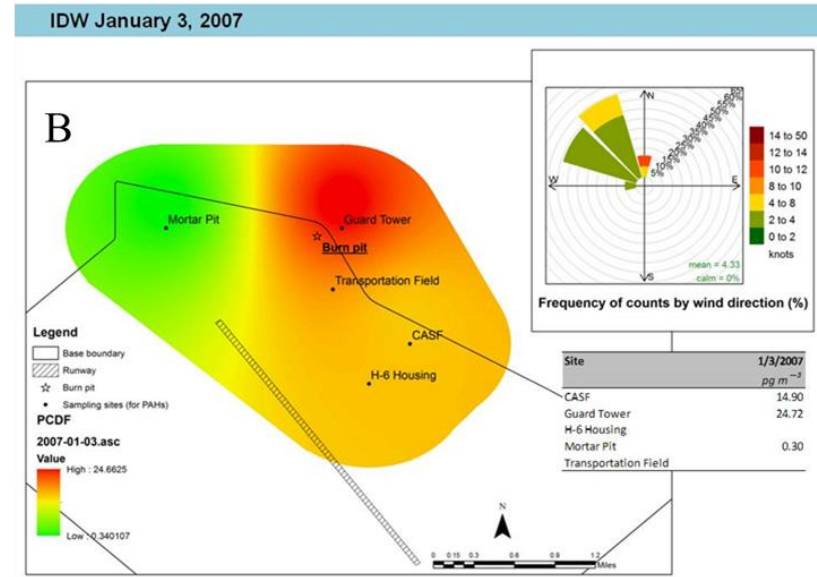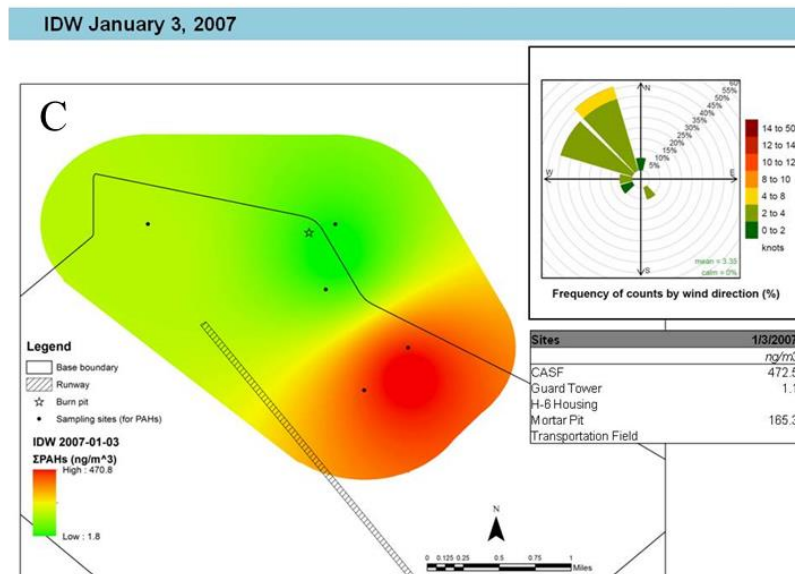

Figure S 3. Interpolated maps for the sum of the PCDD compounds (A), PCDF compounds (B), and PAH compounds (C) on January 3, 2007.

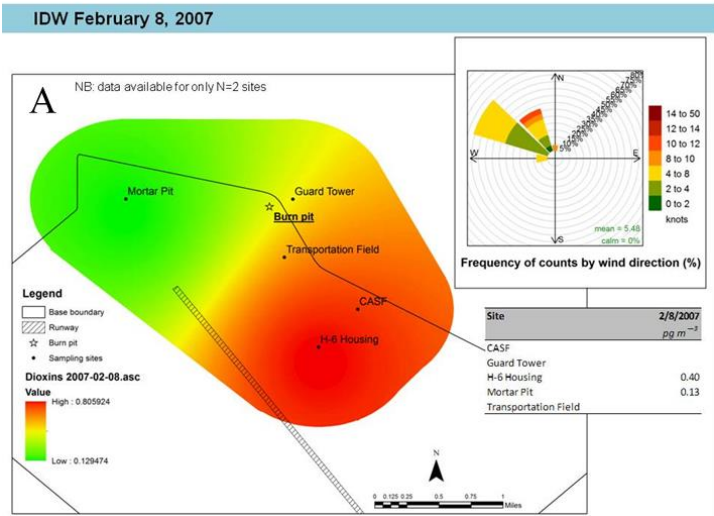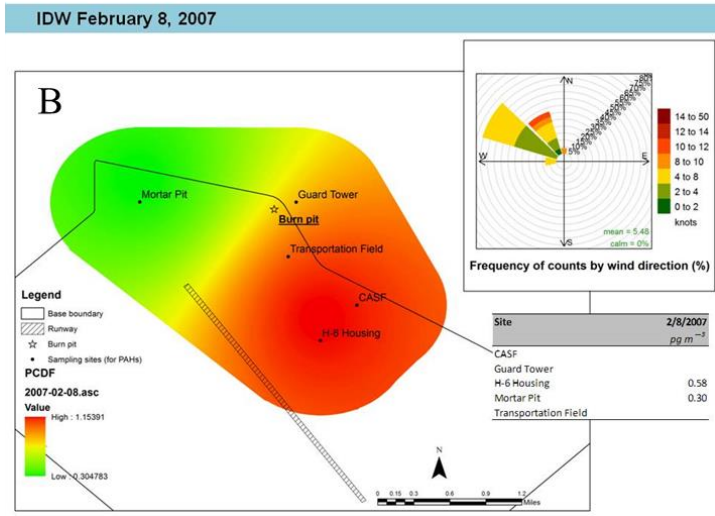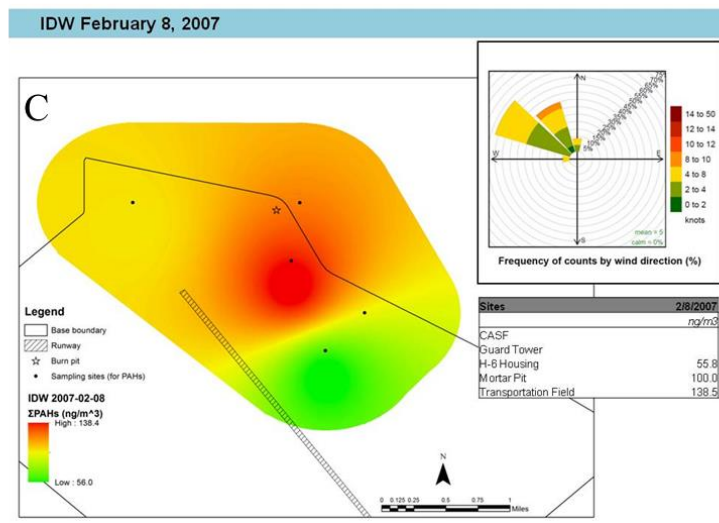

Figure S 4. Interpolated maps for the sum of the PCDD compounds (A), PCDF compounds (B), and PAH compounds (C) on February 8, 2007.

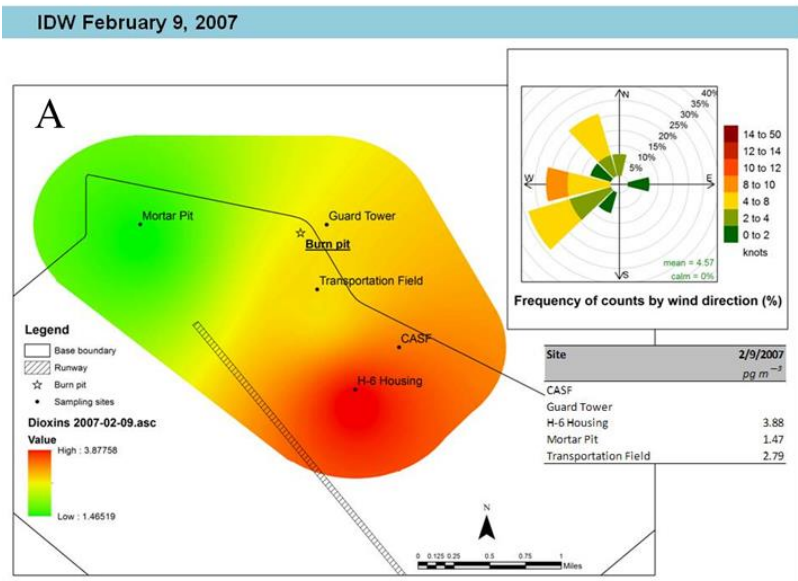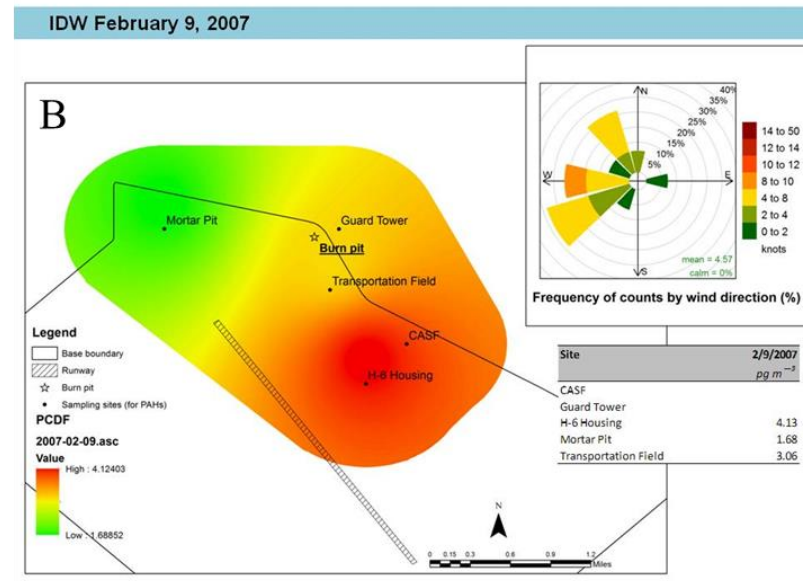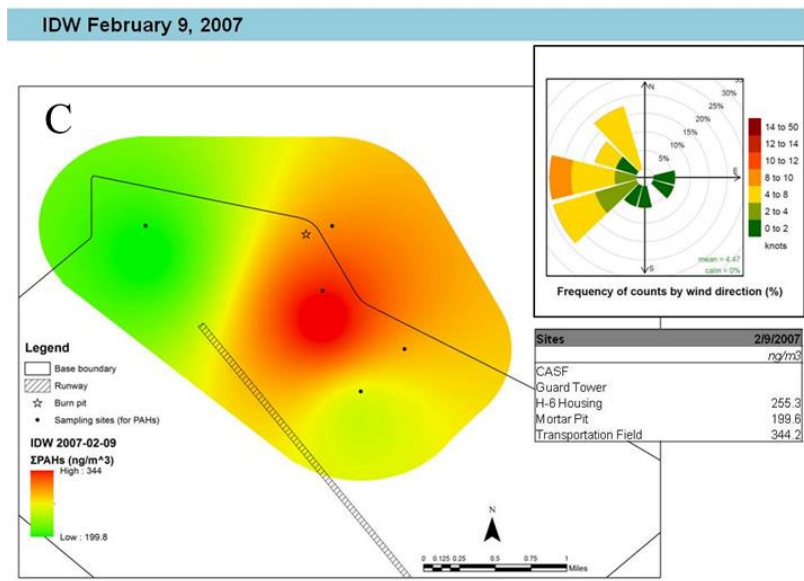

Figure S 5. Interpolated maps for the sum of the PCDD compounds (A), PCDF compounds (B), and PAH compounds (C) on February 9, 2007.

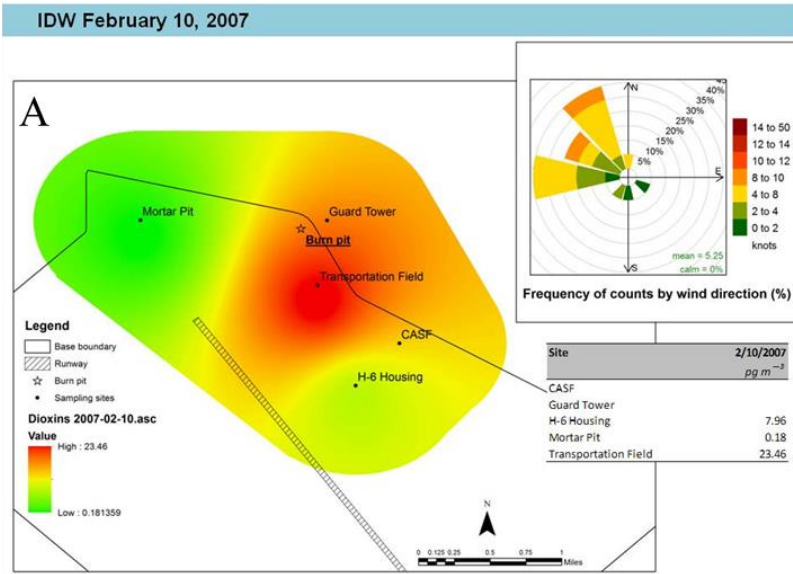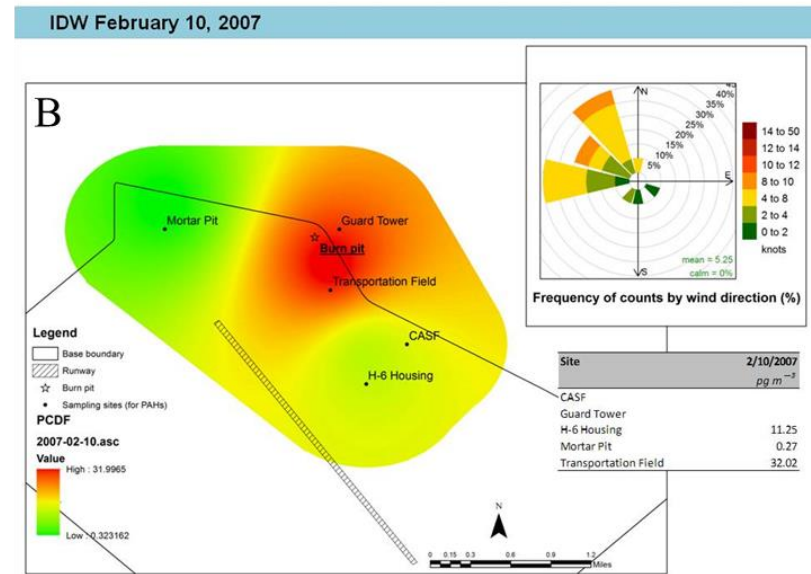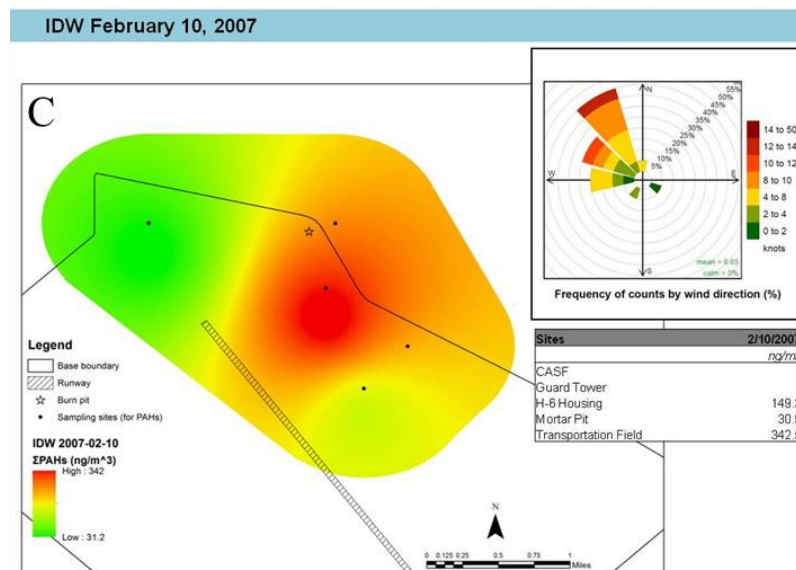

Figure S 6. Interpolated maps for the sum of the PCDD compounds (A), PCDF compounds (B), and PAH compounds (C) on February 10, 2007.

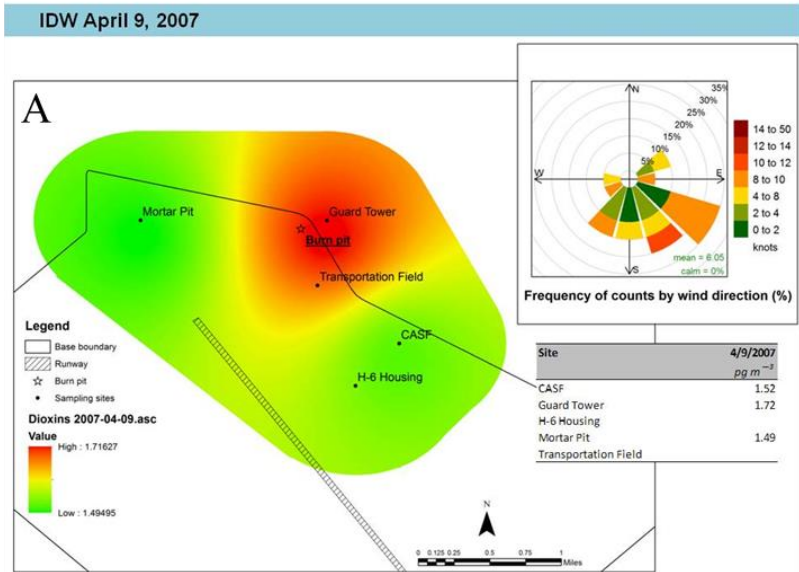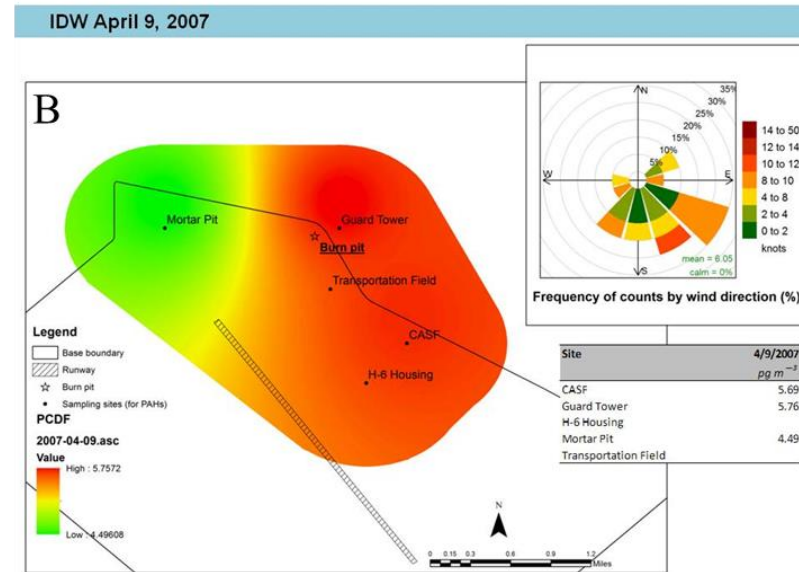

Figure S 7. Interpolated maps for the sum of the PCDD compounds (A) and PCDF compounds (B) on April 9, 2007.

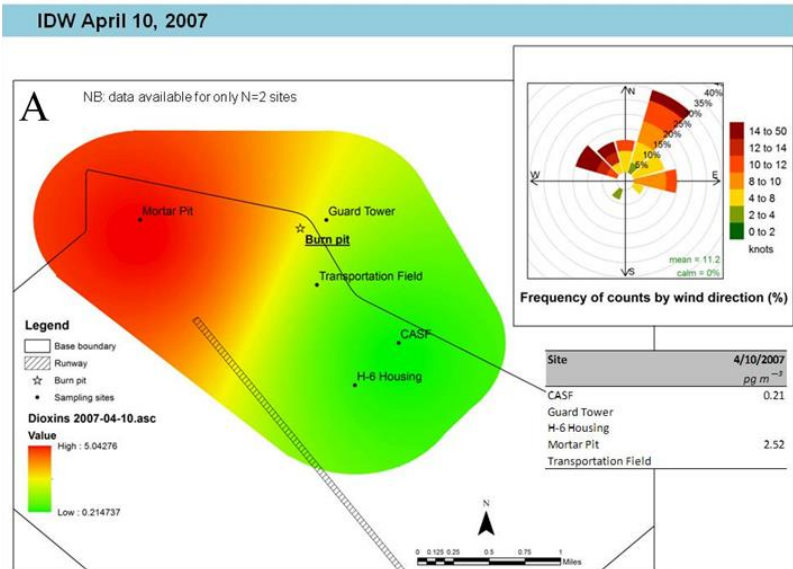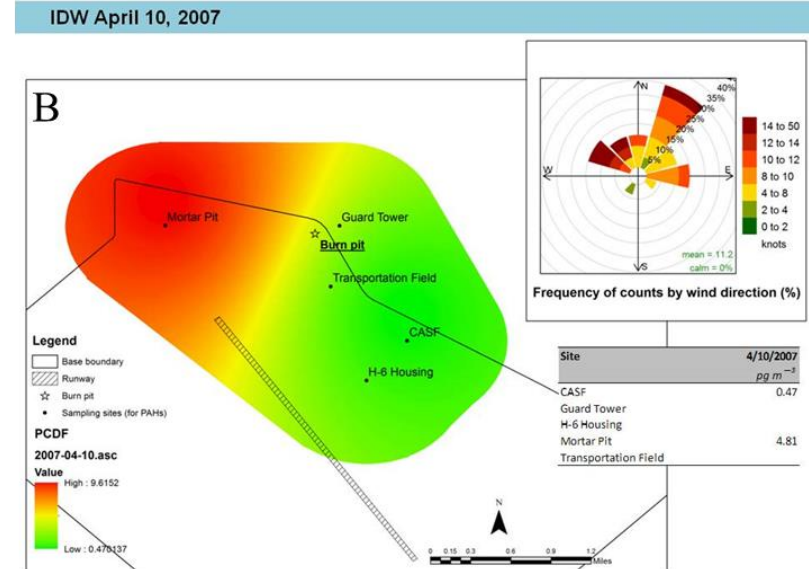

Figure S 8. Interpolated maps for the sum of the PCDD compounds (A) and PCDF compounds (B) on April 10, 2007.



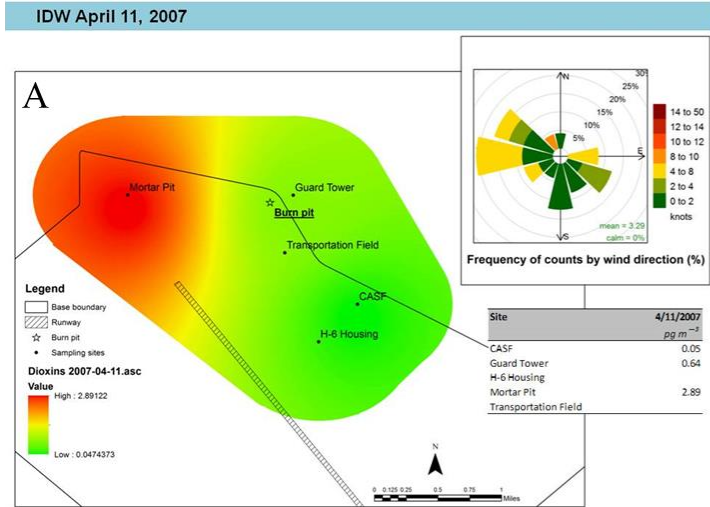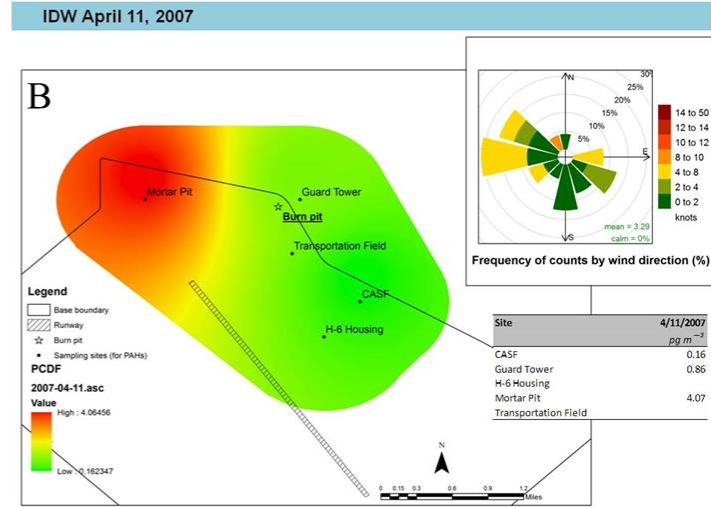

Figure S 9. Interpolated maps for the sum of the PCDD compounds (A) and PCDF compounds (B) on April 11, 2007.

IDW April 13, 2007

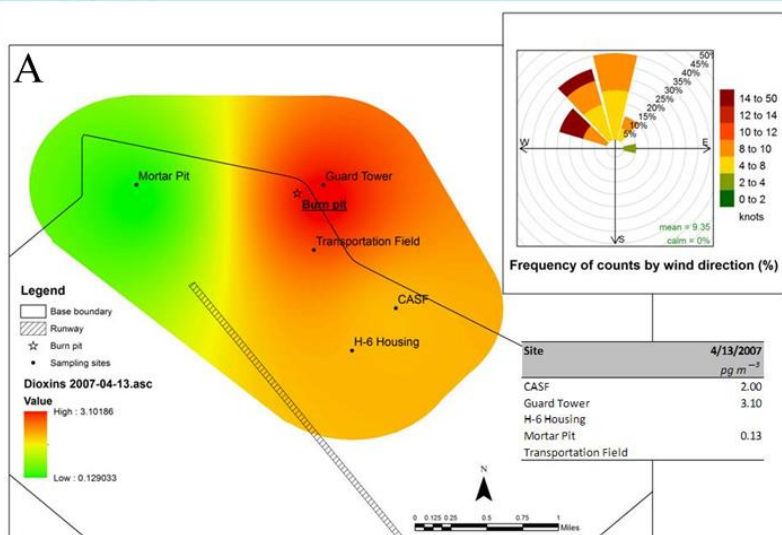

IDW April 13, 2007

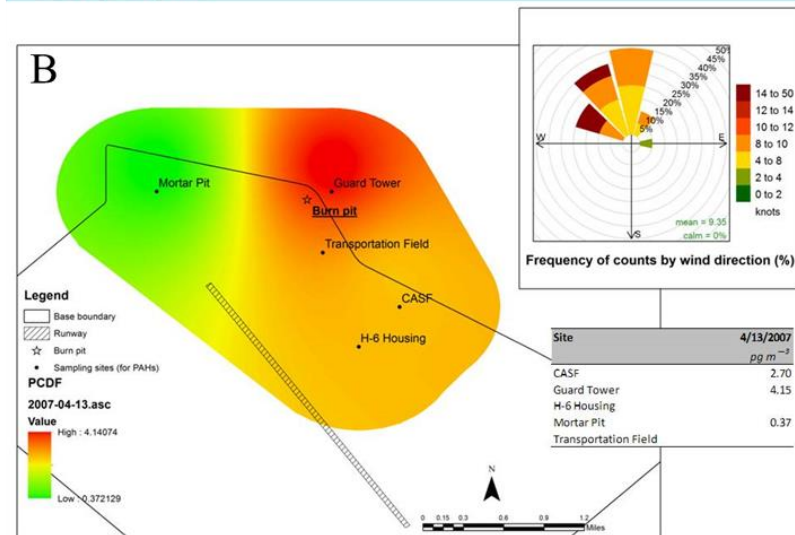

Figure S 10. Interpolated maps for the sum of the PCDD compounds (A) and PCDF compounds (B) on April 13, 2007.

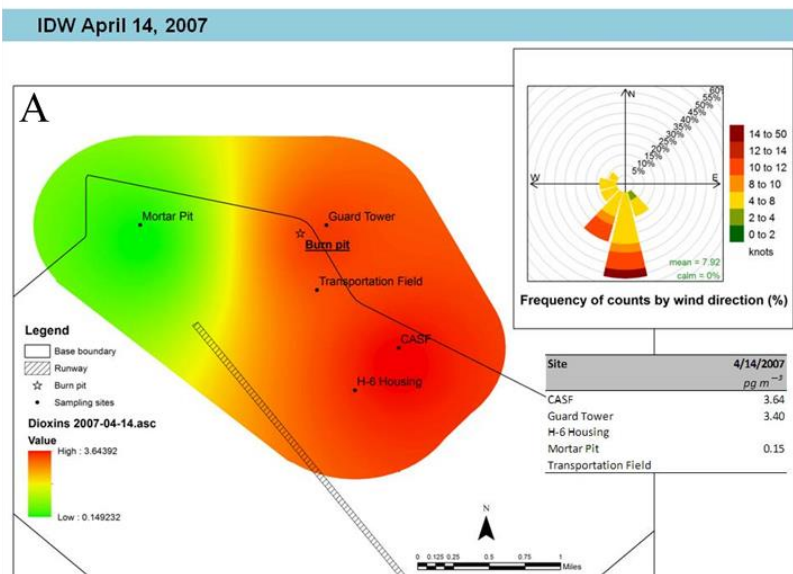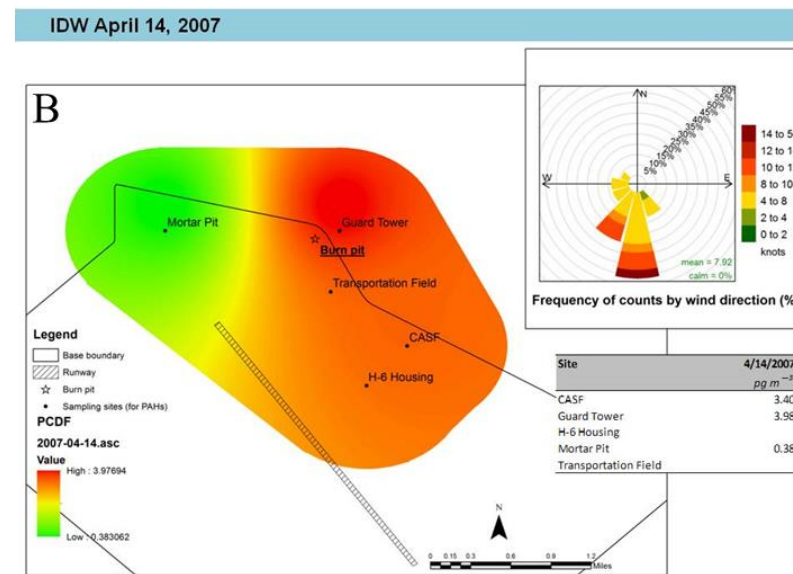

Figure S 11. Interpolated maps for the sum of the PCDD compounds (A) and PCDF compounds (B) on April 14, 2007.

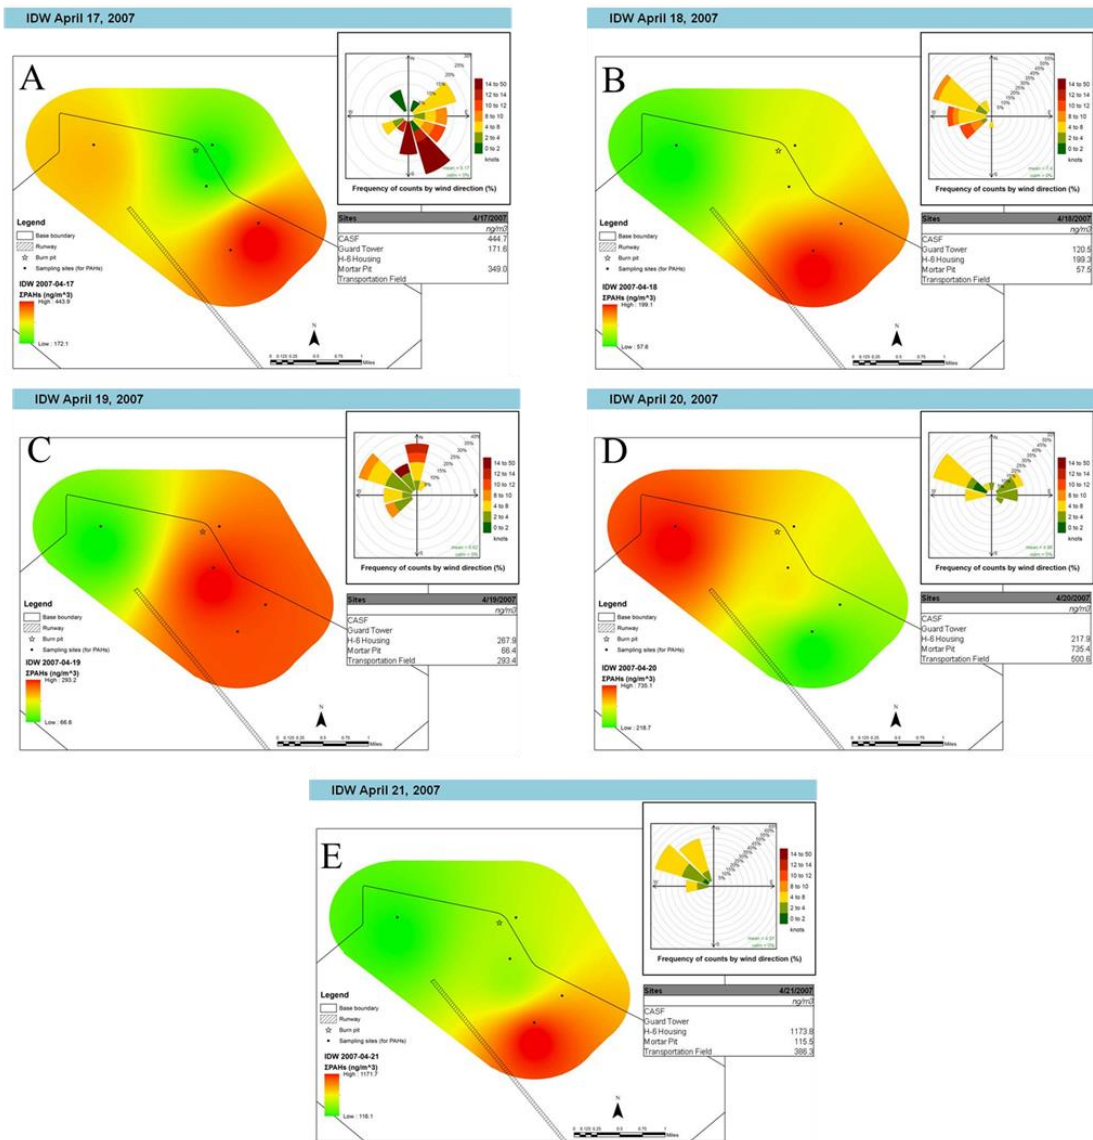

Figure S 12. Interpolated maps for PAH compounds measured on April 17 (A), 18 (B), 19 (C), 20 (D), and 21 (E).

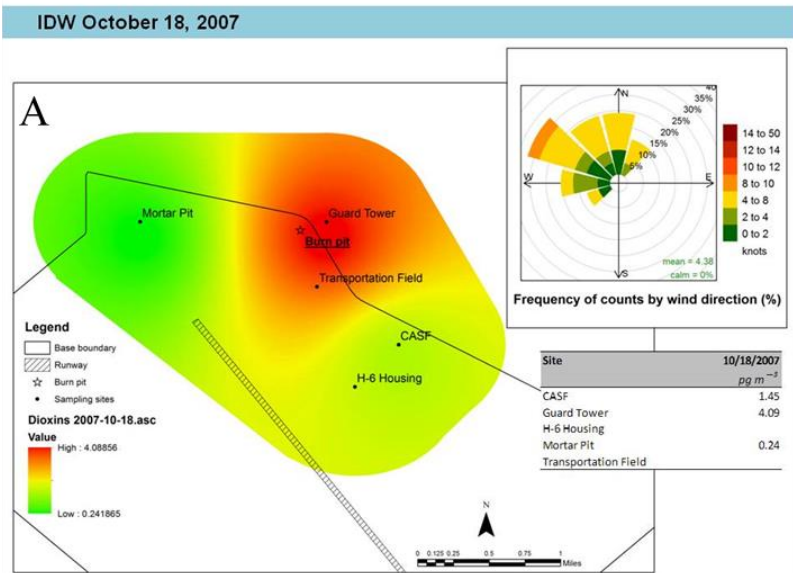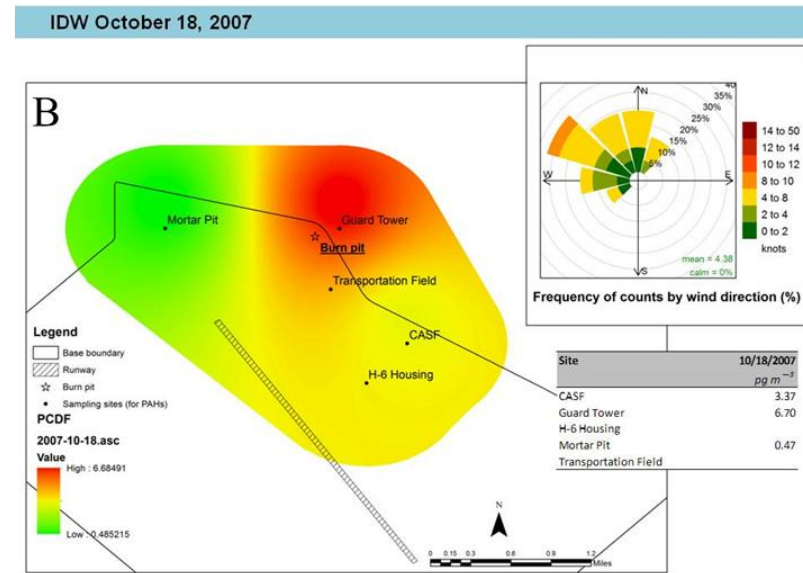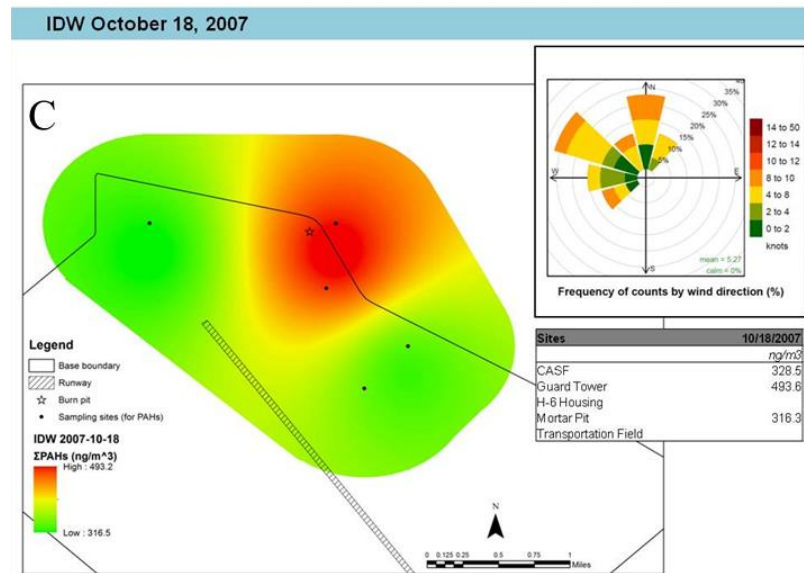

Figure S 13. Interpolated maps for the sum of the PCDD compounds (A), PCDF compounds (B), and PAH compounds (C) on October 18, 2007.

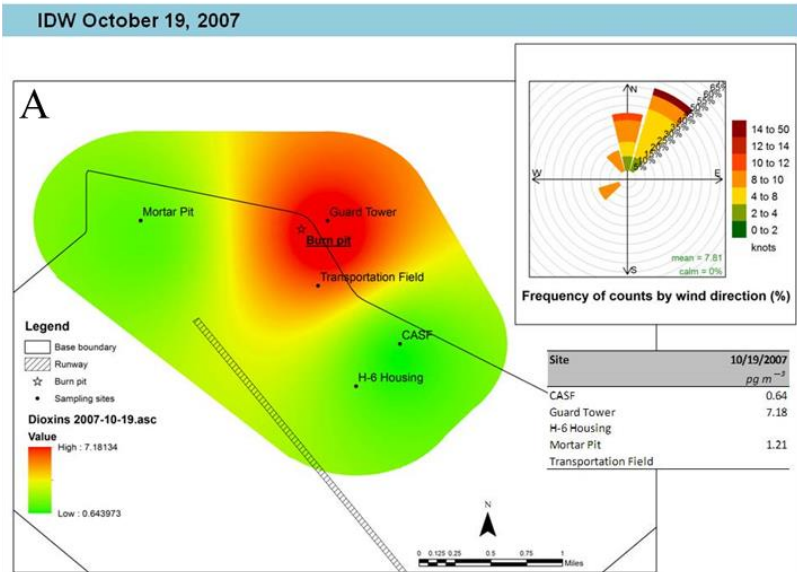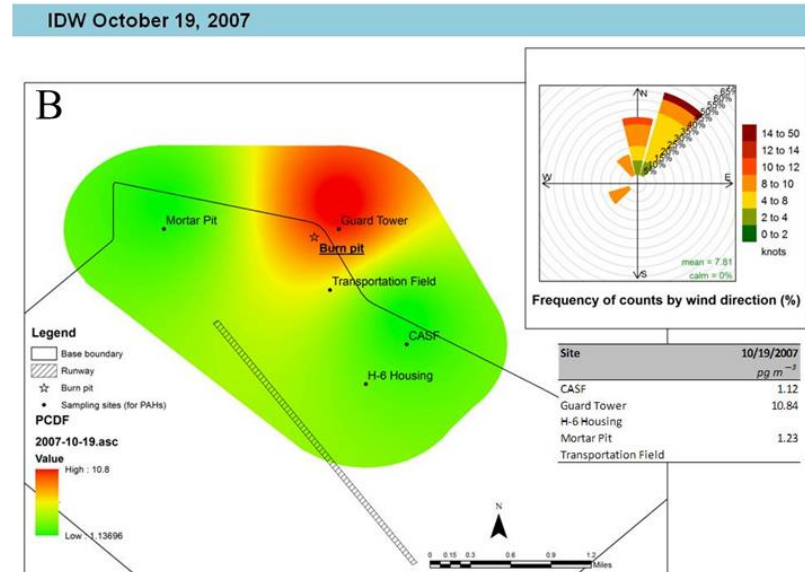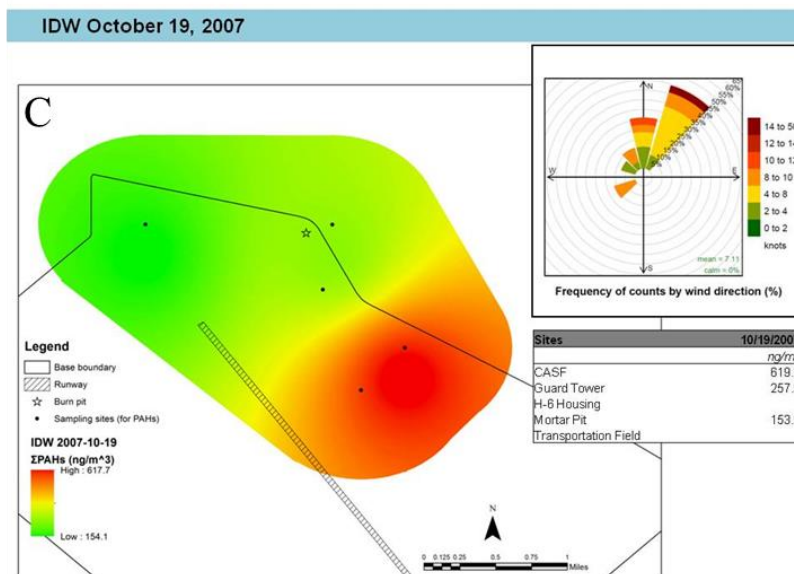

Figure S 14. Interpolated maps for the sum of the PCDD compounds (A), PCDF compounds (B), and PAH compounds (C) on October 19, 2007.

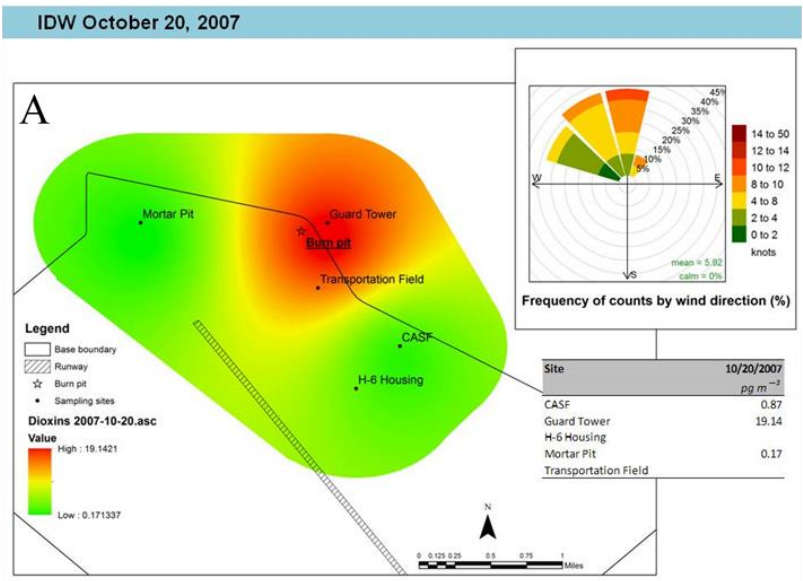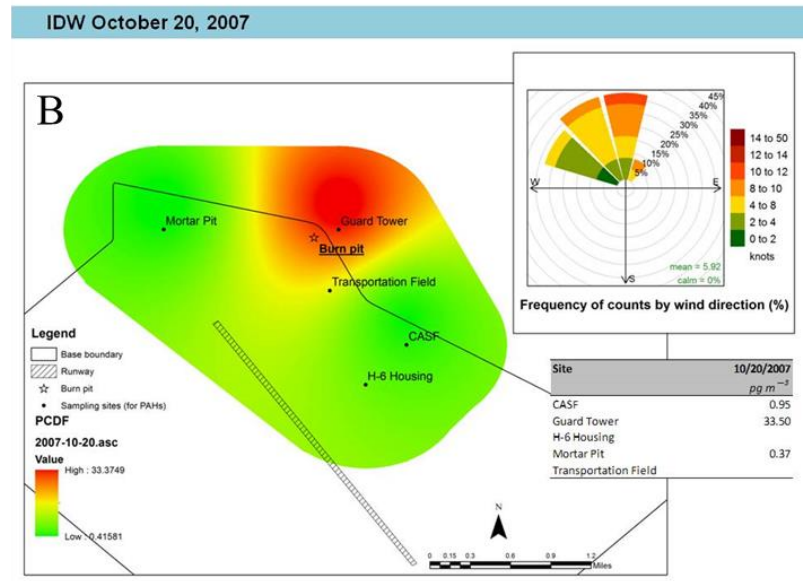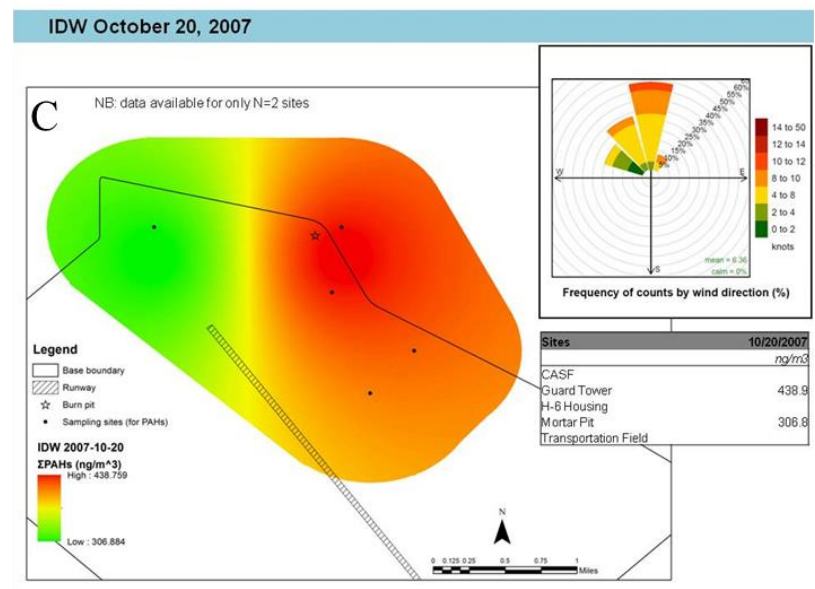

Figure S 15. Interpolated maps for the sum of the PCDD compounds (A), PCDF compounds (B), and PAH compounds (C) on October 20, 2007.

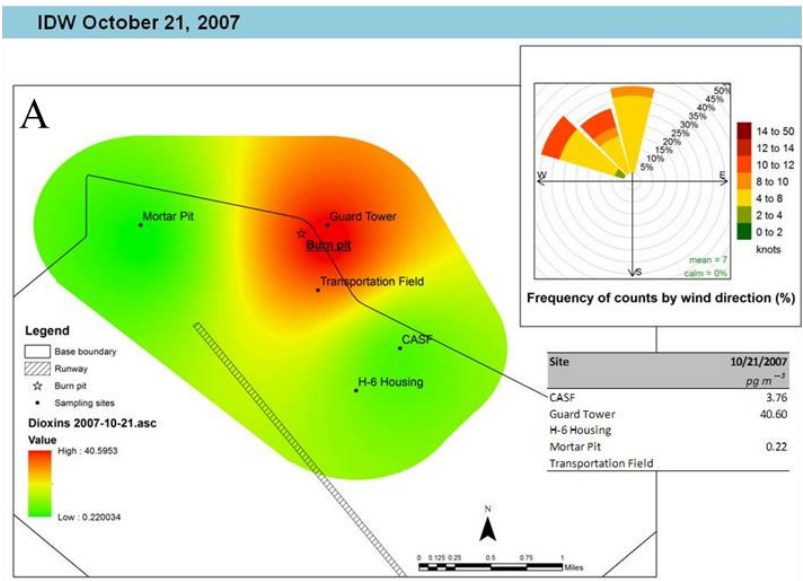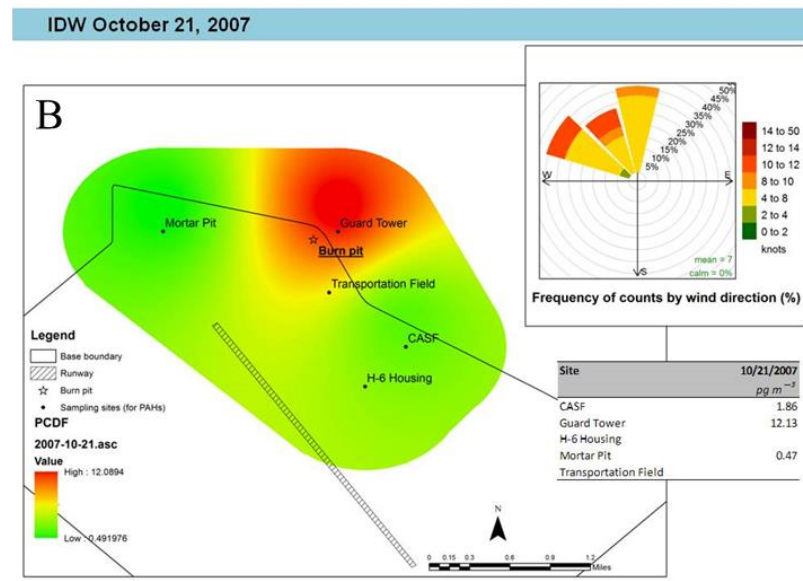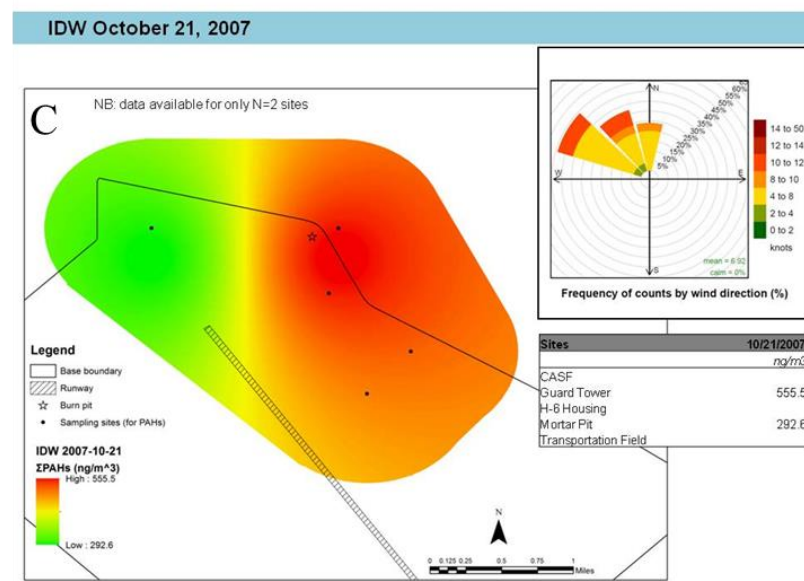

Figure S 16. Interpolated maps for the sum of the PCDD compounds (A), PCDF compounds (B), and PAH compounds (C) on October 21, 2007.



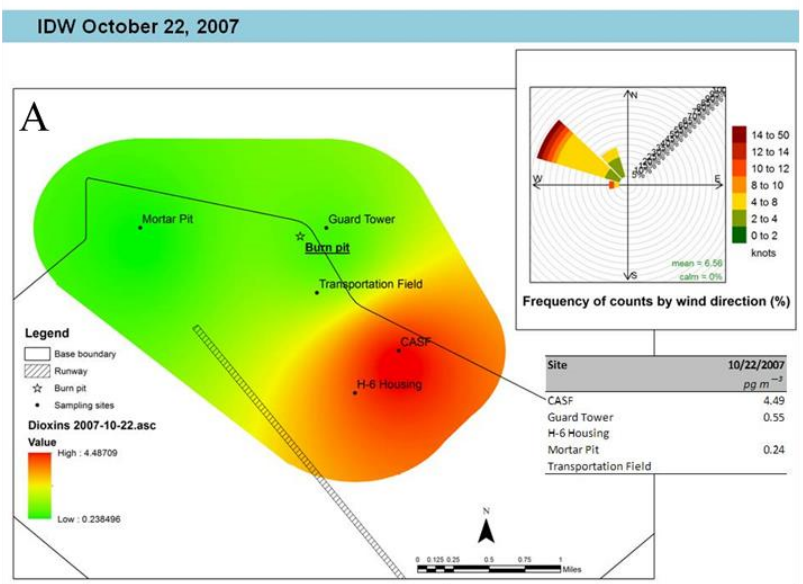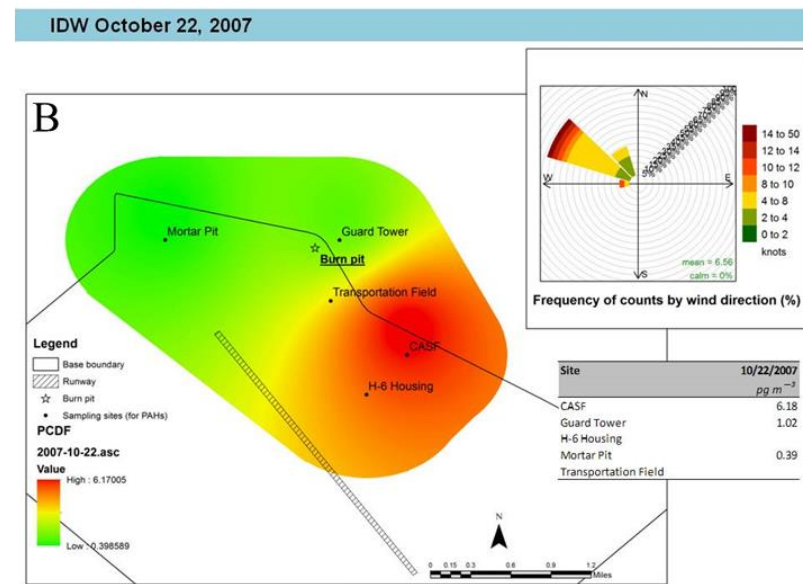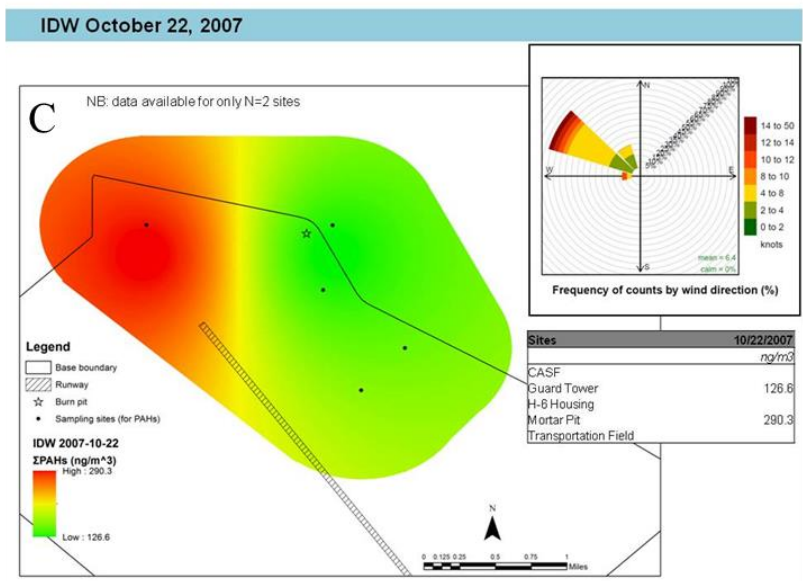

Figure S 17. Interpolated maps for the sum of the PCDD compounds (A), PCDF compounds (B), and PAH compounds (C) on October 22, 2007.

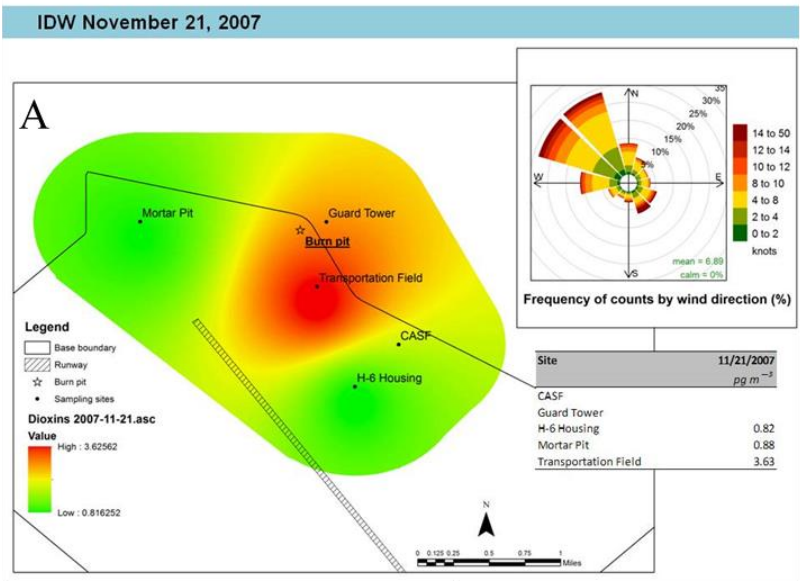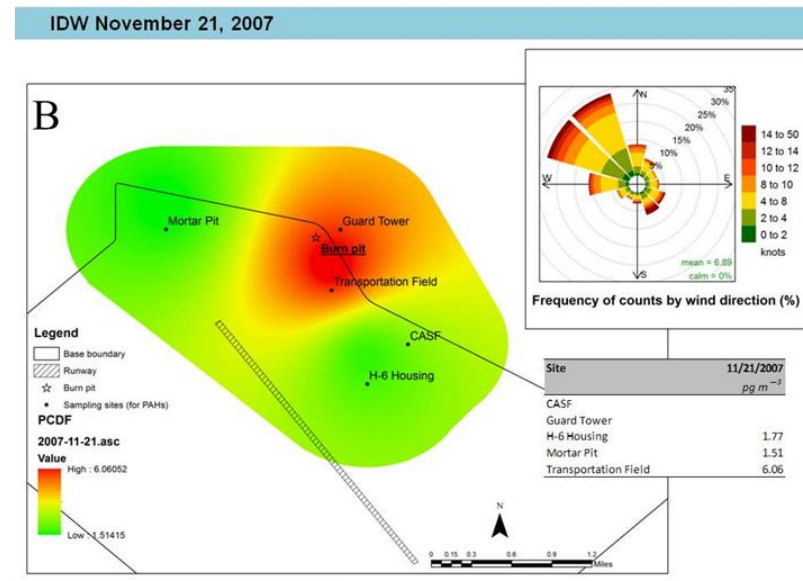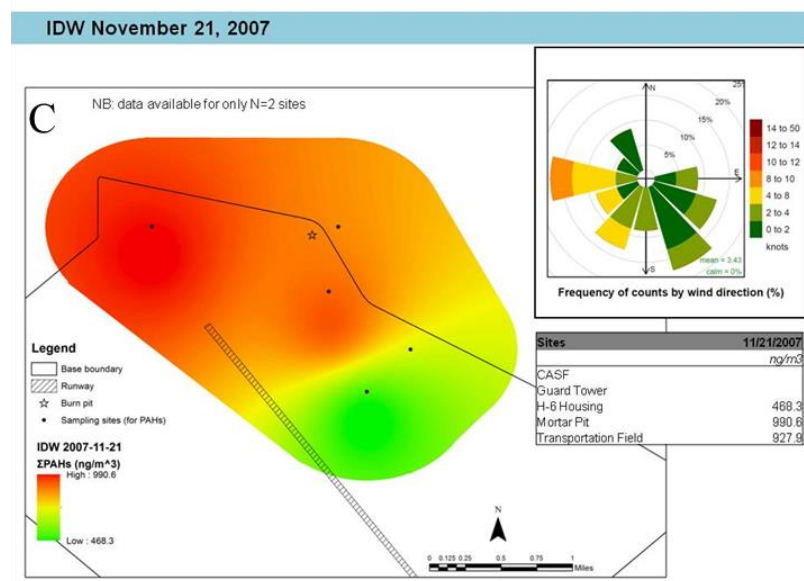

Figure S 18. Interpolated maps for the sum of the PCDD compounds (A), PCDF compounds (B), and PAH compounds (C) on November 21, 2007.

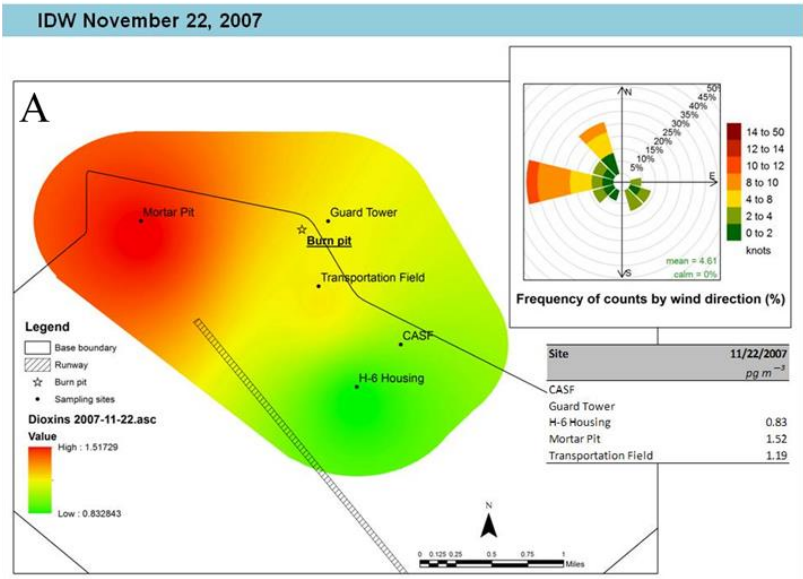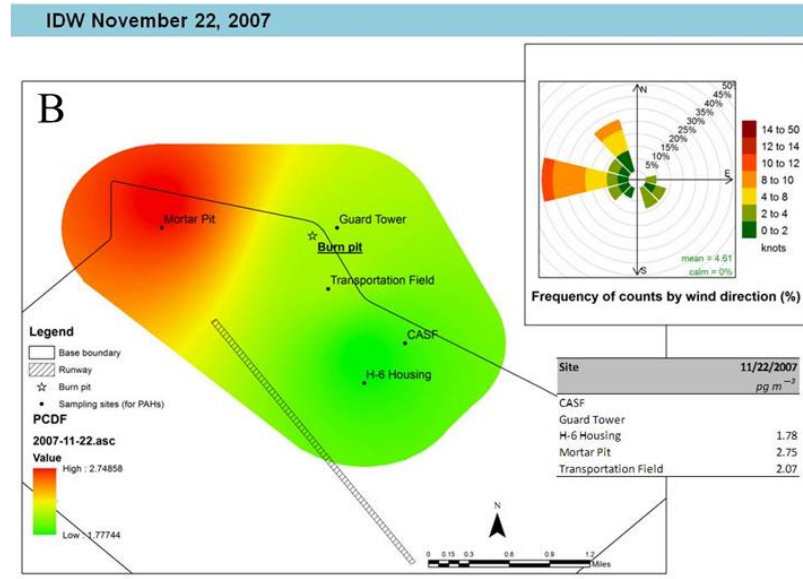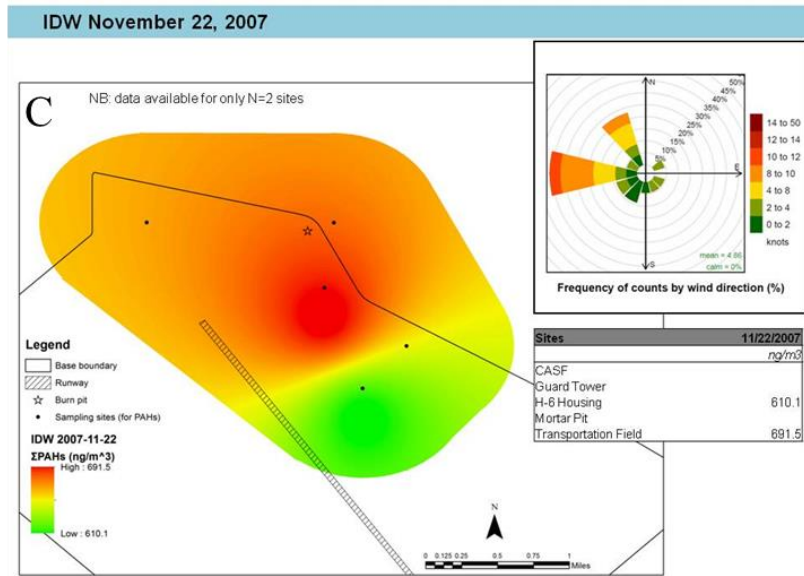

Figure S 19. Interpolated maps for the sum of the PCDD compounds (A), PCDF compounds (B), and PAH compounds (C) on November 22, 2007.

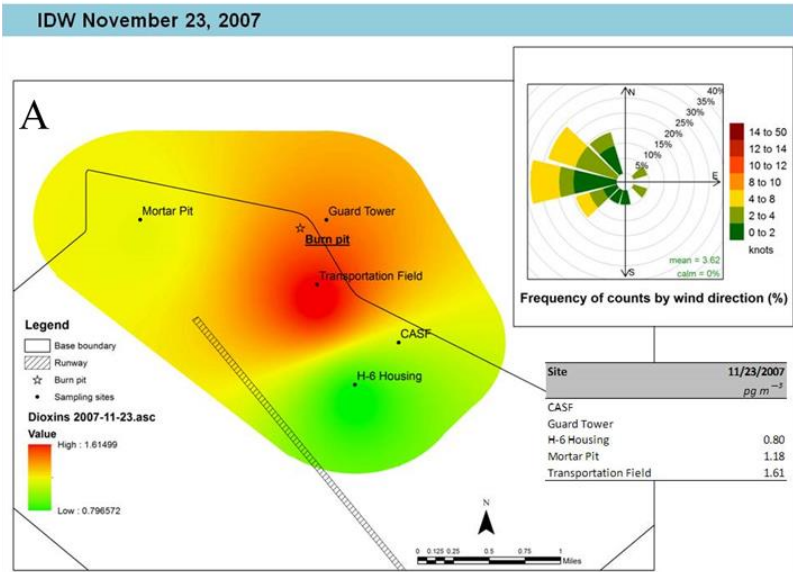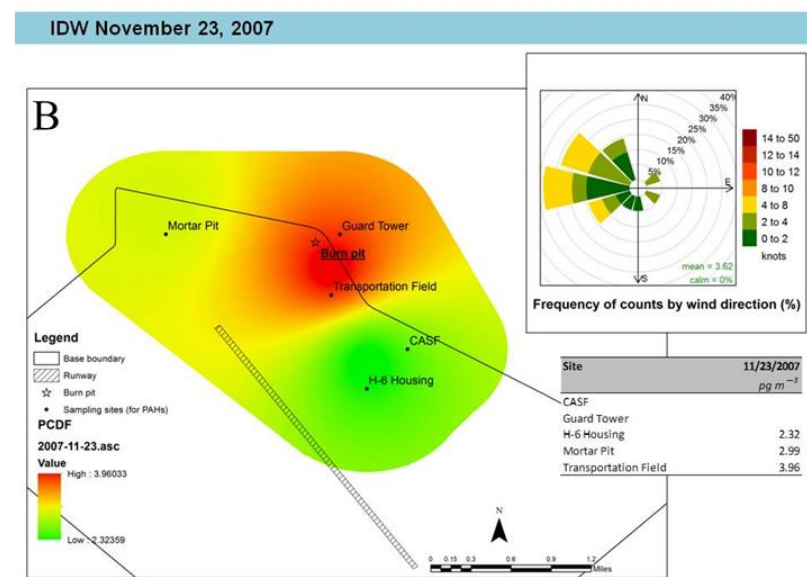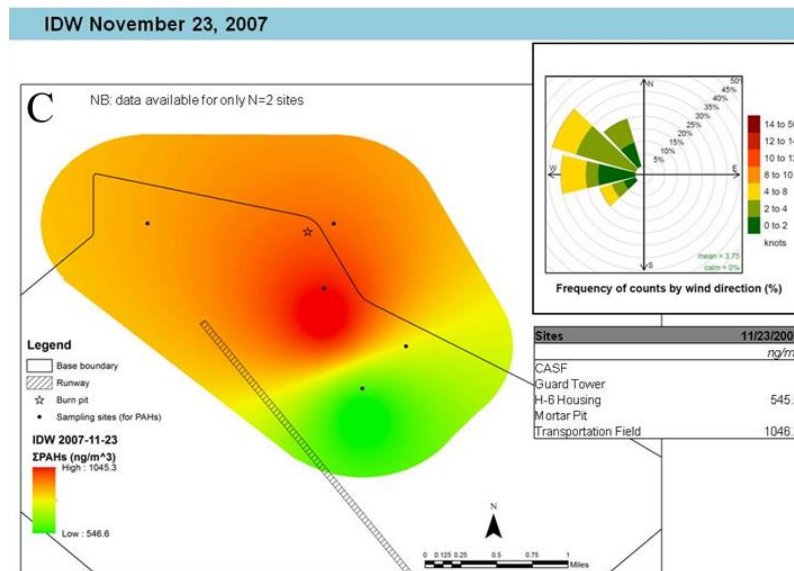

Figure S 20. Interpolated maps for the sum of the PCDD compounds (A), PCDF compounds (B), and PAH compounds (C) on November 23, 2007.

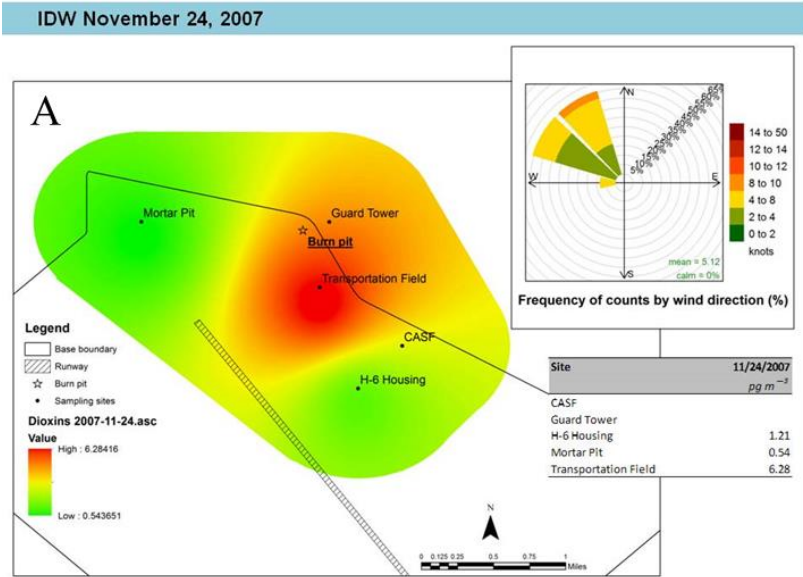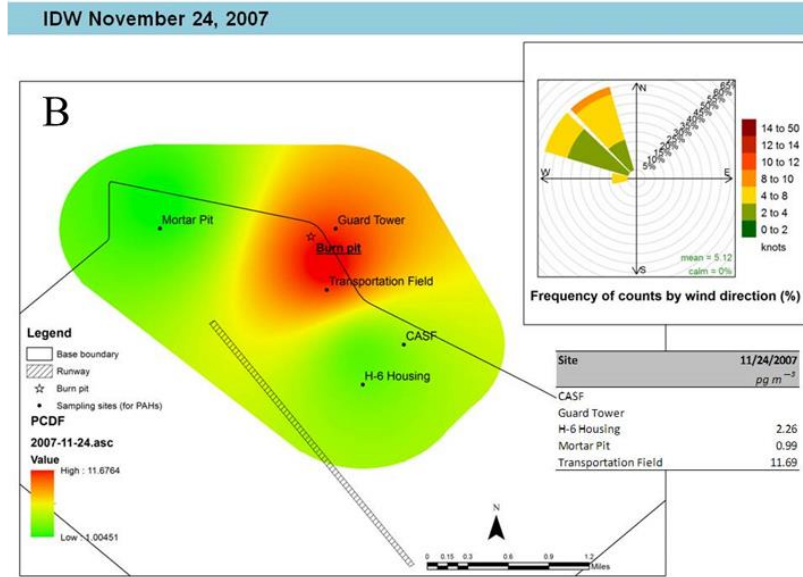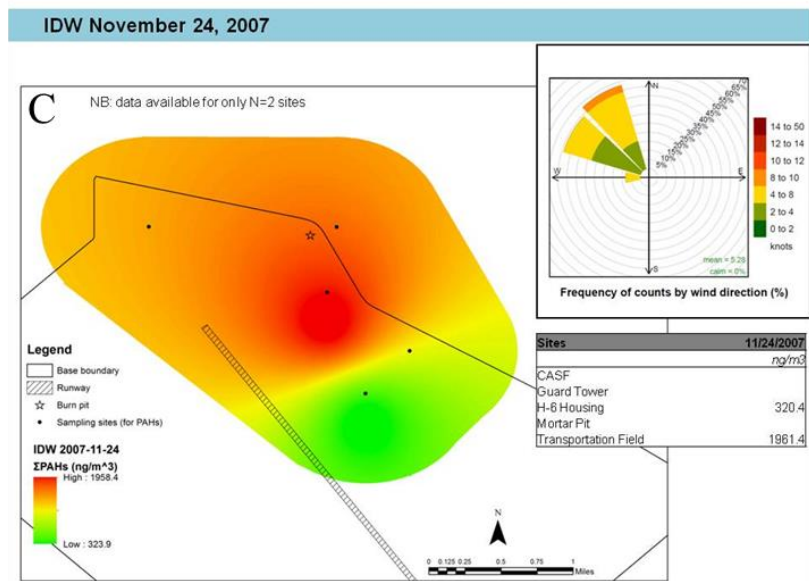

Figure S 21. Interpolated maps for the sum of the PCDD compounds (A), PCDF compounds (B), and PAH compounds (C) on November 24, 2007.

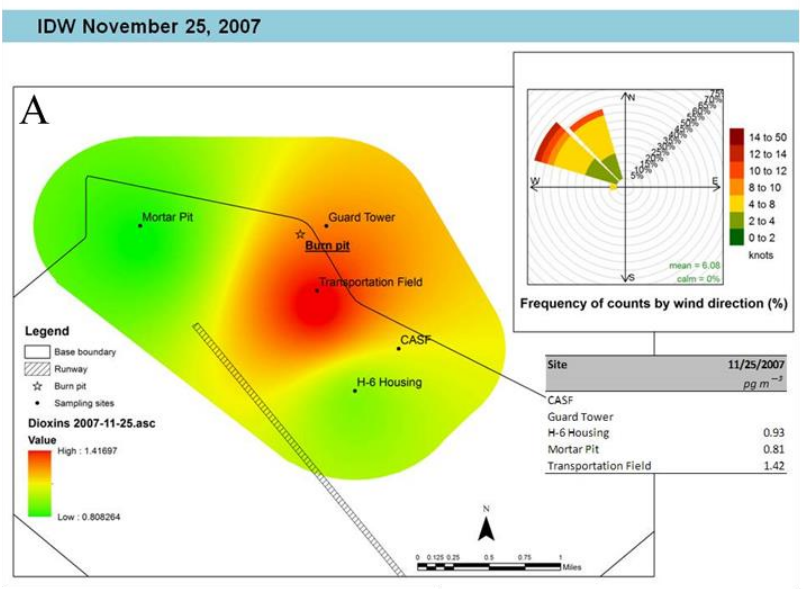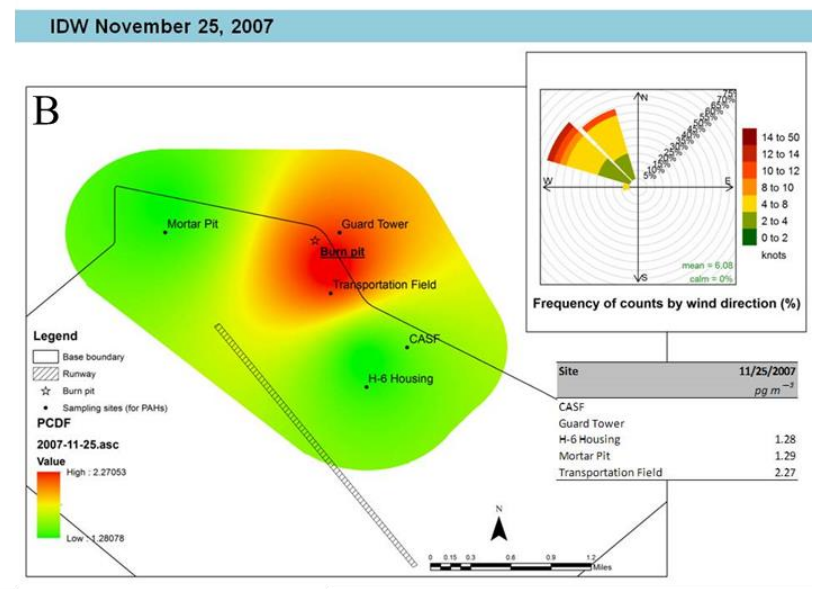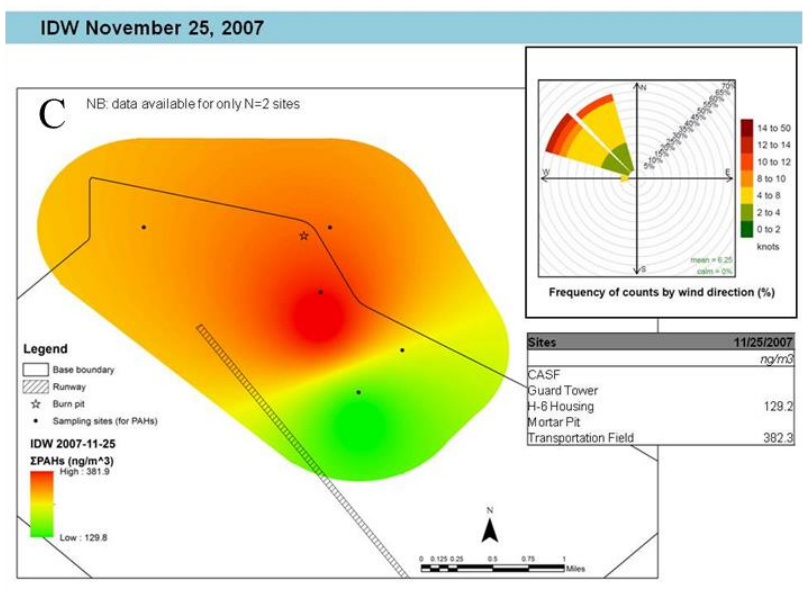

Figure S 22. Interpolated maps for the sum of the PCDD compounds (A), PCDF compounds (B), and PAH compounds (C) on November 25, 2007.
